# Supplementary material
Source: Springer Nature journal article supplement (https://www.springermedizin.de/resource/supplementary/12888_2014_1639_MOESM1_ESM.pdf/9481028)

AVG\_IDCScore BY LCPS FUNCTION RATING

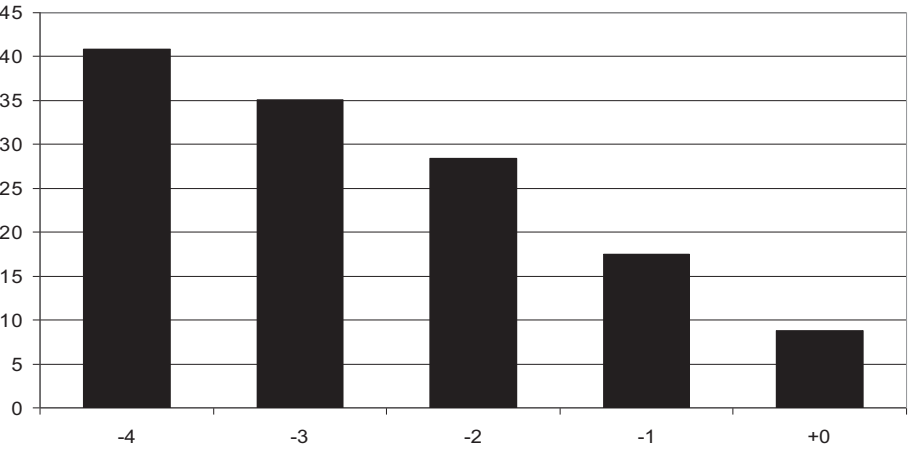

Supplement: MOESM1 [file 9481028]
